# Supplementary material
Source: PubMed Central journal article supplement (PMC9108999)
Supplement: jama-e227993-s003.pdf [file jama-e227993-s003.pdf]

## Supplemental Online Content

Alhazzani W, Parhar KKS, Weatherald J, et al; COVI-PRONE Trial Investigators and the Saudi Critical Care Trials Group. Effect of awake prone positioning on endotracheal intubation in patients with COVID-19 and acute respiratory failure: a randomized clinical trial. *JAMA*. Published online May 15, 2022. doi:10.1001/jama.2022.7993

**eMethods.** Inclusion and exclusion criteria and list of trial outcomes and definitions

**eTable 1.** Screening and enrollment by site

**eTable 2.** Adverse events and serious adverse events (SAEs)

**eTable 3.** Additional characteristics of patients at baseline

**eTable 4.** Interventions and co-interventions after randomization

**eTable 5.** Protocol deviations

**eTable 6.** Additional co-interventions after randomization

**eTable 7.** Duration of oxygenation modality use after randomization

**eTable 8.** Additional analysis for study outcomes

**eTable 9.** Subgroup analyses for endotracheal intubation outcome

**eTable 10.** Reasons for incomplete daily proning (less than 8 hours) in the proning group

**eFigure 1.** Monthly and cumulative enrollment

**eFigure 2.** Duration of proning over time

**eFigure 3.** Duration of proning in the per protocol population on days 1-4

**eFigure 4.** Adherence to any prone positioning in the prone positioning group and control group

**eFigure 5.** Mean SpO<sub>2</sub>:FiO<sub>2</sub> and standard deviations (error bars) pre and post proning (on day 1)

**eFigure 6.** SpO<sub>2</sub>:FiO<sub>2</sub> over time

**eFigure 7.** Fraction of inspired oxygen in study groups over time

This supplemental material has been provided by the authors to give readers additional information about their work.

## eMethods.

### Inclusion and exclusion criteria

|                           |                                                                                                                                                                    |
|---------------------------|--------------------------------------------------------------------------------------------------------------------------------------------------------------------|
| <b>Inclusion Criteria</b> | 1. Adults $\geq$ 18 years of age.                                                                                                                                  |
|                           | 2. Suspected or confirmed Covid-19 (i.e., a positive PCR for SARS CoV-2 or pending PCR results).                                                                   |
|                           | 3. Hypoxemia requiring oxygen supplementation $\geq$ 0.4 FiO <sub>2</sub> or $\geq$ 5L nasal cannula.                                                              |
|                           | 4. Bilateral or unilateral chest infiltrates on x-ray as interpreted by the treating team.                                                                         |
|                           | 5. Admitted to the ICU or an acute care unit where hemodynamic and respiratory monitoring is feasible.                                                             |
| <b>Exclusion Criteria</b> | 1. Immediate need for intubation as determined by the treating team.                                                                                               |
|                           | 2. Decreased level of consciousness (Glasgow Coma Scale score $<$ 10), or significant cognitive impairment that may interfere with compliance (delirium, dementia) |
|                           | 3. Contraindication to proning including, but not limited to any of the following:                                                                                 |
|                           | 4. Open chest or abdomen, abdominal surgery (i.e., laparotomy) within the 4 days,                                                                                  |
|                           | 5. Unstable spine, facial, cervical, femur, or pelvic fractures.                                                                                                   |
|                           | 6. Limited neck mobility or inability to lie prone comfortably                                                                                                     |
|                           | 7. Skeletal deformities that interfere with proning.                                                                                                               |
|                           | 8. Complete bowel obstruction.                                                                                                                                     |
|                           | 9. Active upper gastrointestinal bleeding.                                                                                                                         |
|                           | 10. Patient is unlikely/unable to prone, or to be compliant as indicated by the treating team.                                                                     |
|                           | 11. Body mass index $>$ 40 kg/m <sup>2</sup>                                                                                                                       |

Abbreviations: ICU: Intensive care unit; PCR: Polymerase chain reaction; SARS CoV-2: severe acute respiratory syndrome coronavirus-2

## List of trial outcomes and definitions

| Outcome                   | Definition                                                  |                                                                                                                                                                                                                                                                                                                                                                                                                                                                                                                                                                                                |
|---------------------------|-------------------------------------------------------------|------------------------------------------------------------------------------------------------------------------------------------------------------------------------------------------------------------------------------------------------------------------------------------------------------------------------------------------------------------------------------------------------------------------------------------------------------------------------------------------------------------------------------------------------------------------------------------------------|
| <b>Primary outcome</b>    | Endotracheal Intubation within 30 days                      | Endotracheal Intubation within 30 days of randomization                                                                                                                                                                                                                                                                                                                                                                                                                                                                                                                                        |
| <b>Secondary outcomes</b> | Mortality at 60 days                                        | Status of life at 60-days                                                                                                                                                                                                                                                                                                                                                                                                                                                                                                                                                                      |
|                           | Invasive mechanical ventilation free days at 30 days        | Number of days alive and not receiving mechanical ventilation                                                                                                                                                                                                                                                                                                                                                                                                                                                                                                                                  |
|                           | Non-invasive ventilation free days at 30 days               | Number of days alive and not receiving non-invasive mechanical ventilation                                                                                                                                                                                                                                                                                                                                                                                                                                                                                                                     |
|                           | Days alive and outside the Intensive Care Unit              | Number of days alive and outside the Intensive Care Unit                                                                                                                                                                                                                                                                                                                                                                                                                                                                                                                                       |
|                           | Days alive and outside of the hospital truncated at 60 days | Number of days alive and outside of hospital                                                                                                                                                                                                                                                                                                                                                                                                                                                                                                                                                   |
| <b>Safety outcomes</b>    | Complications from proning                                  | Includes any of the following: accidental removal of intravenous access, hypotension, pressure injuries, or other occurring during the proning intervention.                                                                                                                                                                                                                                                                                                                                                                                                                                   |
|                           | Adverse Events                                              | Any adverse event occurring following study mandated procedures, directly related to the treatment or intervention.<br>a) Any serious adverse event occurring following study mandated procedures, directly related to the treatment or intervention that results in any of the following outcomes: (death, life-threatening adverse event, disability, or incapacity)<br>b) Any event that may jeopardize the patient and requires medical or surgical intervention to prevent one of the outcomes listed above, which the attending physician perceives may be directly related to enrolment |
| <b>Protocol deviation</b> | Intervention arm                                            | A protocol deviation in the Intervention arm (prone) is defined as the number of patients with zero proning hours across all days before meeting the stopping criteria.                                                                                                                                                                                                                                                                                                                                                                                                                        |
|                           | Control arm                                                 | A protocol deviation in the control arm is defined as the number of patients with any proning hours before meeting the stopping criteria                                                                                                                                                                                                                                                                                                                                                                                                                                                       |

**eTable 1.** Screening and enrollment by site

| Country                   | Center                                                      | Randomized patients |         |                | Total Per Country |
|---------------------------|-------------------------------------------------------------|---------------------|---------|----------------|-------------------|
|                           |                                                             | Proning             | Control | Total Per Site |                   |
| Canada                    | St Joseph's Healthcare Hamilton                             | 17                  | 16      | 33             | 161               |
|                           | Juravinski Hospital                                         | 5                   | 4       | 9              |                   |
|                           | Hamilton General Hospital                                   | 1                   | 0       | 1              |                   |
|                           | Niagara Health St. Catharine's General                      | 2                   | 6       | 8              |                   |
|                           | South Health Campus                                         | 7                   | 4       | 11             |                   |
|                           | Foothills Medical Centre                                    | 15                  | 13      | 28             |                   |
|                           | Rockyview General Hospital                                  | 6                   | 4       | 10             |                   |
|                           | Peter Lougheed Centre                                       | 21                  | 22      | 43             |                   |
|                           | Mount Sinai Hospital                                        | 8                   | 4       | 12             |                   |
|                           | CHU de Québec-Université Laval                              | 2                   | 3       | 5              |                   |
| University Health Network | 1                                                           | 0                   | 1       |                |                   |
| Saudi Arabia              | King Abdulaziz Medical City, Riyadh                         | 31                  | 31      | 62             | 162               |
|                           | King Abdulaziz Medical City, Jeddah                         | 5                   | 7       | 12             |                   |
|                           | King Fahd Hospital of the University, Khobar                | 20                  | 19      | 39             |                   |
|                           | King Faisal Specialist Hospital and Research Centre, Riyadh | 18                  | 18      | 36             |                   |
|                           | Prince Mohammad Bin Abdulaziz Hospital Madinah              | 0                   | 2       | 2              |                   |
|                           | King Abdulaziz Hospital, NGHHA                              | 6                   | 5       | 11             |                   |
| Kuwait                    | Jaber AL Ahmed hospital                                     | 11                  | 11      | 22             | 49                |
|                           | Al-Amiri Hospital                                           | 15                  | 12      | 27             |                   |
| United States             | Lyndon B Johnson Hospital, Houston                          | 15                  | 13      | 28             | 28                |

**eTable 2.** Adverse events and serious adverse events

| Adverse Events n (%)                  | Prone Group (n=205) |         | Control Group (n=195) |        |
|---------------------------------------|---------------------|---------|-----------------------|--------|
|                                       | Patients            | Events  | Patients              | Events |
| <b>All Events</b>                     | 21 (10)             | 26      | 0 (0)                 | 0      |
| Musculoskeletal and Other Pain        | 13 (62)             | 16 (62) | 0 (0)                 | 0 (0)  |
| Desaturation                          | 2 (10)              | 4 (15)  | 0 (0)                 | 0 (0)  |
| Coughing                              | 1 (5)               | 1 (4)   | 0 (0)                 | 0 (0)  |
| Dizziness & Shortness of Breath       | 1 (5)               | 1 (4)   | 0 (0)                 | 0 (0)  |
| Hypotension & Desaturation            | 1 (5)               | 1 (4)   | 0 (0)                 | 0 (0)  |
| Accidental Intravenous Access Removal | 1 (5)               | 1 (4)   | 0 (0)                 | 0 (0)  |
| Nausea                                | 1 (5)               | 1 (4)   | 0 (0)                 | 0 (0)  |
| Shortness of breath                   | 1 (5)               | 1 (4)   | 0 (0)                 | 0 (0)  |
| <b>Serious Adverse Events n (%)</b>   | 0 (0)               |         | 0 (0)                 |        |

**eTable 3.** Additional characteristics of patients at baseline

| Category                              | Proning Group<br>(n=205) | Control Group<br>(n=195) |
|---------------------------------------|--------------------------|--------------------------|
| <b>Comorbidities</b>                  |                          |                          |
| <b>Cardiac n (%)</b>                  |                          |                          |
| Hypertension                          | 94 (46)                  | 96 (49)                  |
| CAD                                   | 12 (6)                   | 17 (9)                   |
| Arrhythmia                            | 6 (3)                    | 8 (4)                    |
| CHF                                   | 6 (3)                    | 5 (3)                    |
| Stroke                                | 5 (2)                    | 9 (5)                    |
| <b>Respiratory n (%)</b>              |                          |                          |
| Asthma                                | 16 (8)                   | 17 (9)                   |
| COPD                                  | 7 (3)                    | 8 (4)                    |
| Others                                | 2 (1)                    | 1 (0.50)                 |
| ILD                                   | 1 (0.5)                  | 1 (0.50)                 |
| <b>Gastrointestinal n (%)</b>         |                          |                          |
| IBD                                   | 1 (0.5)                  | 2 (1)                    |
| Cirrhosis                             | 0 (0)                    | 0 (0)                    |
| <b>Hematologic n (%)</b>              |                          |                          |
| <b>Immunocompromised n (%)</b>        |                          |                          |
| <b>Endocrine n (%)</b>                |                          |                          |
| Diabetes                              | 83 (40)                  | 76 (39)                  |
| Hypothyroidism                        | 14 (7)                   | 19 (10)                  |
| Morbid obesity                        | 0 (0)                    | 1 (0.5)                  |
| <b>Renal n (%)</b>                    |                          |                          |
| CKD                                   | 13 (6)                   | 7 (4)                    |
| ESRD on dialysis                      | 2 (1)                    | 5 (3)                    |
| <b>Solid Organ Malignancy n (%)</b>   |                          |                          |
| <b>Hematological malignancy n (%)</b> |                          |                          |
| <b>Rheumatological Diseases n (%)</b> |                          |                          |
| <b>Transplant n (%)</b>               |                          |                          |
| <b>None n (%)</b>                     | 47 (23)                  | 41 (21)                  |
| <b>Other comorbidities n (%)</b>      | 71 (35)                  | 74 (38)                  |

|                                    |         |         |
|------------------------------------|---------|---------|
| <b>Pharmacologic interventions</b> |         |         |
| <b>Medication n (%)</b>            |         |         |
| Statin                             | 58 (28) | 61 (31) |
| ARB                                | 33 (16) | 30 (15) |
| ACE-I                              | 20 (10) | 22 (11) |
| <b>Inotropes n (%)</b>             |         |         |
| Dopamine                           | 1 (0.5) | 0 (0)   |
| <b>Vasopressors n (%)</b>          |         |         |
| Norepinephrine                     | 1 (0.5) | 1 (0.5) |
| Vasopressin                        | 0 (0)   | 0 (0)   |
| Phenylephrine                      | 0 (0)   | 0 (0)   |
| <b>Sedatives n (%)</b>             |         |         |
| Dexmedetomidine                    | 4 (2)   | 5 (3)   |
| Benzodiazepines                    | 3 (1)   | 3 (2)   |

|                              |                 |                 |
|------------------------------|-----------------|-----------------|
| Haloperidol                  | 1 (0.50)        | 0 (0)           |
| Fentanyl                     | 0 (0)           | 1 (0.5)         |
| Zopiclone                    | 0 (0)           | 1 (0.5)         |
| Ketamine                     | 0 (0)           | 1 (0.5)         |
| <b>Corticosteroids n (%)</b> | <b>194 (95)</b> | <b>186 (95)</b> |
| Dexamethasone                | 186 (91)        | 178 (91)        |
| Methylprednisolone           | 5 (2)           | 6 (3)           |
| Prednisone                   | 2 (1)           | 0 (0)           |
| Hydrocortisone               | 1 (0.5)         | 1 (0.5)         |
| Fluticasone <sup>a</sup>     | 0 (0)           | 1 (0.5)         |
| Prednisolone                 | 0 (0)           | 1 (0.5)         |
| <b>Antibiotics n (%)</b>     | <b>163 (80)</b> | <b>154 (79)</b> |
| Cephalosporins               | 103 (50)        | 99 (51)         |
| Macrolides                   | 85 (41)         | 80 (41.)        |
| Others                       | 52 (25)         | 57 (29)         |
| Quinolones                   | 10 (5)          | 6 (3)           |
| Tetracyclines                | 15 (7)          | 11 (6)          |
| Penicillins                  | 9 (4)           | 8 (4)           |
| Carbapenem                   | 7 (3)           | 9 (5)           |
| <b>Anticoagulation n (%)</b> | <b>181 (88)</b> | <b>179 (92)</b> |
| <b>Prophylactic dosing</b>   |                 |                 |
| Enoxaparin                   | 94 (46)         | 90 (46)         |
| Tinzaparin                   | 37 (18)         | 37 (19)         |
| Heparin                      | 15 (7)          | 15 (8)          |
| Dalteparin                   | 12 (6)          | 13 (7)          |
| <b>Therapeutic Dosing</b>    |                 |                 |
| Enoxaparin                   | 9 (4)           | 8 (4)           |
| Heparin                      | 5 (2)           | 9 (5)           |
| Dalteparin                   | 3 (1)           | 1 (0.5)         |
| Warfarin                     | 3 (1)           | 0 (0)           |
| Rivaroxaban                  | 2 (1)           | 2 (1)           |
| Apixaban                     | 1 (0.5)         | 4 (2)           |

**Abbreviations:** ACE-I – angiotensin converting enzyme inhibitor; ARB – angiotensin receptor blocker; CAD – coronary artery disease; CHF – congestive heart failure; CKD – chronic kidney disease; COPD – chronic obstructive pulmonary disease; ESRD – end-stage renal disease; IBD – inflammatory bowel disease; ILD – interstitial lung disease.

<sup>a</sup>Participant on Fluticasone also receiving Dexamethasone

**eTable 4.** Interventions and cointerventions after randomization

| Variable                                                                                           | Proning Group<br>(n= 205)   | Control Group<br>(n=195)    |
|----------------------------------------------------------------------------------------------------|-----------------------------|-----------------------------|
| Prone positioning                                                                                  |                             |                             |
| Duration of daily proning as randomized cohort (day 1) — hours/day, median (IQR)                   | 5 (2 to 8)                  | 0 (0 - 0)                   |
| Duration of daily proning per-protocol cohort <sup>a</sup> (day 1) — hours/day, median (IQR)       | 6 (2.5 - 8)                 | -                           |
| Duration of daily proning as randomized cohort (days 1 to 4) — hours/day, median (IQR)             | 4.8 (1.8 - 8)               | 0 (0 - 0)                   |
| Duration of daily proning per-protocol cohort <sup>a</sup> (days 1 to 4) — hours/day, median (IQR) | 5 (2.6 - 8)                 | -                           |
| Days of proning — days, median (IQR)                                                               | 3 (1 to 5)                  | 0 (0 - 0)                   |
| Patients who underwent awake proning — no. (%)                                                     | 184 (90)                    | 38 (19)                     |
| Respiratory support — no. (%) <sup>b</sup>                                                         |                             |                             |
| High-flow oxygen                                                                                   | 176 (86)                    | 165 (85)                    |
| Low-flow oxygen <sup>c</sup>                                                                       | 143 (70)                    | 122 (63)                    |
| Noninvasive positive pressure ventilation                                                          | 53 (26)                     | 60 (31)                     |
| Kidney replacement therapy — no. (%) <sup>d</sup>                                                  | 5 (2)                       | 10 (5)                      |
| Vasoactive agents — no. (%) <sup>d</sup>                                                           | 29 (14)                     | 37 (19)                     |
| Median daily fluid balance (days 1 to 4) — ml, median (IQR) <sup>e</sup>                           | -176 (-474 to 300)<br>n=182 | - 50 (-434 to 346)<br>n=178 |
| Pharmacologic interventions — no. (%) <sup>d</sup>                                                 |                             |                             |
| Corticosteroids                                                                                    | 202 (99)                    | 193 (99)                    |
| Prophylactic dose anticoagulation                                                                  | 184 (90)                    | 176 (90)                    |
| Tocilizumab                                                                                        | 30 (15)                     | 24 (12)                     |
| Remdesivir                                                                                         | 28 (14)                     | 21 (11)                     |
| Therapeutic dose anticoagulation                                                                   | 24 (12)                     | 21 (11)                     |
| Hydroxychloroquine or chloroquine                                                                  | 7 (3)                       | 7 (4)                       |



|                               |         |       |
|-------------------------------|---------|-------|
| Convalescent plasma — no. (%) | 1 (0.5) | 4 (2) |
|-------------------------------|---------|-------|

IQR: interquartile range

<sup>a</sup> Per-protocol analysis excluded 21 patients from the intervention group who did not undergo any prone positioning and 38 patients from the control group who underwent any hours of prone positioning

<sup>b</sup> Representing the number of patients who received respiratory support during intensive care or acute care stay.

<sup>c</sup> Low-flow oxygen includes oxygen delivery via any device other than high-flow nasal cannula or non-invasive ventilation regardless of the fraction of oxygen delivered to the patient.

<sup>d</sup> These frequencies represent the number of patients who received an intervention before meeting proning stopping criteria during daily data collection, it does not include periods after meeting the stopping criteria (i.e., death, improvement in the fraction of inspired Oxygen requirement by 40% from baseline value that is sustained for 24 hours; intubation; or the patient is discharged from the ICU or monitored setting).

<sup>e</sup> The mean daily fluid balance was derived from 182 patients in the intervention group and 178 patients in the control group.

**eTable 5. Protocol deviations**

| <b>Variable</b>                          | <b>Proning Group<br/>(n=205)</b> | <b>Control Group<br/>(n=195)</b> |
|------------------------------------------|----------------------------------|----------------------------------|
| Protocol deviation, n (%)                | 21 (10)                          | 38 (19)                          |
| <b>Reasons, n (%)</b>                    |                                  |                                  |
| Patient Preference                       | 15 (71)                          | 21 (55)                          |
| Care Team Preference                     | 0 (0)                            | 19 (50)                          |
| Not Documented                           | 3 (14)                           | 0 (0)                            |
| Oxygenation Mode <sup>a</sup>            | 1 (5)                            | 0 (0)                            |
| Agitation                                | 1 (5)                            | 0 (0)                            |
| Desaturation                             | 1 (5)                            | 0 (0)                            |
| Patient was randomized late in the day   | 1 (5)                            | 0 (0)                            |
| Allocation miscommunication to care team | 0 (0)                            | 1 (3)                            |

<sup>a</sup> Oxygenation delivery mode was deemed as a barrier to prone positioning

The proportion of patients with a protocol deviation of the entire group is described. A protocol deviation in the proning group was defined as any patient with zero hours of proning across all days before meeting intervention stopping criteria. Each patient may have more than 1 reason for the protocol deviation. A protocol deviation in the control arm is defined as any prone positioning after randomization before meeting intervention stopping criteria.

**eTable 6.** Additional co-interventions after randomization

| Category                            | Proning Group<br>(n=205) | Control Group<br>(n=195) |
|-------------------------------------|--------------------------|--------------------------|
| <b>Anticoagulation</b> n (%)        | 204 (100) <sup>a</sup>   | 191 (98) <sup>a</sup>    |
| <b>Prophylactic dosing</b>          | 184 (90)                 | 176 (90)                 |
| Enoxaparin                          | 110 (54)                 | 105 (54)                 |
| Tinzaparin                          | 47 (23)                  | 41 (21)                  |
| Heparin                             | 18 (9)                   | 20 (10)                  |
| Dalteparin                          | 17 (8)                   | 16 (8)                   |
| <b>Therapeutic dosing</b>           | 24 (12)                  | 21 (11)                  |
| Heparin                             | 19 (9)                   | 17 (9)                   |
| Dalteparin                          | 4 (2)                    | 3 (2)                    |
| Apixaban                            | 3 (1)                    | 7 (4)                    |
| Warfarin                            | 3 (1)                    | 1 (0.5)                  |
| Tinzaparin                          | 2 (1)                    | 2 (1)                    |
| Rivaroxaban                         | 2 (1)                    | 1 (0.5)                  |
| <b>Corticosteroids</b> n (%)        | 202 (99) <sup>a</sup>    | 193 (99) <sup>a</sup>    |
| Dexamethasone                       | 197 (96)                 | 186 (95)                 |
| Methylprednisolone                  | 9 (4)                    | 11 (6)                   |
| Prednisone                          | 7 (3)                    | 8 (4)                    |
| Hydrocortisone                      | 3 (1)                    | 6 (3)                    |
| Prednisolone                        | 0 (0)                    | 1 (0.5)                  |
| <b>COVID-19 Interventions</b> n (%) | 75 (37) <sup>a</sup>     | 63 (32) <sup>a</sup>     |
| Remdesivir                          | 28 (14)                  | 21 (11)                  |
| Favipravir                          | 19 (9)                   | 13 (7)                   |
| Lopinavir/ Ritonavir                | 10 (5)                   | 12 (6)                   |
| CQ/ HCQ                             | 7 (3)                    | 7 (4)                    |
| CQ/ HCQ plus azithromycin           | 5 (2)                    | 3 (2)                    |
| Azithromycin                        | 4 (2)                    | 3 (2)                    |
| Vitamin C                           | 4 (2)                    | 6 (3)                    |
| Ribavirin                           | 3 (1)                    | 3 (2)                    |
| Convalescent plasma                 | 1 (0.5)                  | 4 (2)                    |
| LSALT Peptide                       | 1 (0.5)                  | 0 (0)                    |
| Vadadustat                          | 1 (0.5)                  | 0 (0)                    |
| Ivermectin                          | 0 (0)                    | 1 (0.5)                  |

**Abbreviations:** CQ – chloroquine; HCQ – hydroxychloroquine.

<sup>a</sup>Total number of participants includes some patients receiving multiple co-interventions at any time during 30-day study period.

**eTable 7.** Duration of oxygenation modality use after randomization

| <b>Variable</b>                | <b>Proning Group</b>                      | <b>Control Group</b>                      |
|--------------------------------|-------------------------------------------|-------------------------------------------|
| <b>Days on HFO</b><br>median   | 4.0 (interquartile range 2 to 6)<br>n=176 | 4.0 (interquartile range 2 to 6)<br>n=165 |
| <b>Days on LFO</b><br>median   | 3.0 (interquartile range 2 to 5)<br>n=143 | 3.0 (interquartile range 2 to 6)<br>n=122 |
| <b>Days on NIPPV</b><br>median | 2.0 (interquartile range 1 to 5)<br>n=53  | 2.0 (interquartile range 1 to 4)<br>n=60  |

**Abbreviations:** LFO: low flow oxygen; HFO: high flow oxygen; NIPPV: non-invasive positive pressure ventilation

For those patients on the specified oxygen modality, the duration of oxygenation modality post randomization during the trial intervention period is described. Patients may have received more than one modality during the trial intervention period.

**eTable 8.** Additional analysis for study outcomes

| Outcome                                                                   | Adjusted Relative Effect or Difference (95% CI) | P Value |
|---------------------------------------------------------------------------|-------------------------------------------------|---------|
| <b>Primary outcome</b> <sup>a</sup><br>Endotracheal intubation at 30 days | HR 0.79 (0.57 to 1.09)                          | 0.16    |
| <b>Secondary outcomes</b> <sup>a</sup>                                    |                                                 |         |
| Mortality at 60 days                                                      | HR 0.93 (0.62 to 1.40)                          | 0.73    |
| Ventilation free days at 30 days                                          | MD 2.04 (-0.41 to 4.49)                         | 0.10    |
| Invasive ventilation free days at 30 days                                 | MD 2.03 (-0.39 to 4.44)                         | 0.10    |
| Intensive Care Unit free days at 60 days                                  | MD 4.12 (-0.44 to 8.69)                         | 0.08    |
| Hospital free days at 60 days                                             | MD 3.41 (-0.98 to 7.79)                         | 0.13    |
| <b>Post hoc outcomes</b>                                                  |                                                 |         |
| Composite of intubation or death at 30 days <sup>b</sup>                  | HR 0.75 (0.55 to 1.02) <sup>c</sup>             | 0.07    |
|                                                                           | RR 0.82 (0.67 to 1.00) <sup>d</sup>             | 0.05    |
| Mixed effect modelling <sup>e</sup>                                       | HR 0.80 (0.58 to 1.11)                          | 0.18    |

**Abbreviations:** CI – Confidence interval, HR – hazard ratios, MD – Mean Difference, RR – Relative risk

<sup>a</sup> Analysis were adjusted for center and severity of hypoxemia.

<sup>b</sup> 74 patients (36%) in the proning group and 89 patients (46%) in the control group developed the outcome

<sup>c</sup> Analysis for this *post hoc* composite outcome was done using unadjusted Cox regression (proportional hazard) analysis

<sup>d</sup> Analysis for this *post hoc* composite outcome was done using  $\chi^2$  test.

<sup>e</sup> Mixed effect modelling using site as random effect

**eTable 9.** Subgroup analyses for endotracheal intubation outcome

| Subgroup                                | Awake Prone<br>Events/total | Control<br>Events/total | Hazard Ratio<br>(95% CI) | Absolute difference<br>(95% CI) | P-<br>Interaction | FDR% |
|-----------------------------------------|-----------------------------|-------------------------|--------------------------|---------------------------------|-------------------|------|
| <b>Severity of hypoxia at baseline</b>  |                             |                         |                          |                                 | 0.03              | 12   |
| SpO <sub>2</sub> :FiO <sub>2</sub> >150 | 13/84 (15)                  | 25/78 (32)              | 0.44 (0.23 to 0.87)      | -16.58% (-29.50 to -3.65)       |                   |      |
| SpO <sub>2</sub> :FiO <sub>2</sub> ≤150 | 57/121 (47)                 | 54/117 (46)             | 1.02 (0.70 to 1.48)      | 0.95% (-11.72 to 13.63)         |                   |      |
| <b>Respiratory Support at baseline</b>  |                             |                         |                          |                                 | 0.54              | 73   |
| Low flow oxygen                         | 14/45 (31)                  | 10/43 (23)              | 1.35 (0.60 to 3.05)      | 7.86% (-10.65 to 26.36)         |                   |      |
| High flow oxygen                        | 49/148 (33)                 | 65/132 (49)             | 0.61 (0.42 to 0.88)      | -16.13% (-27.55 to -4.72)       |                   |      |
| NIPPV                                   | 7/12 (58)                   | 4/20 (20)               | 3.69 (1.07 to 12.70)     | 38.33% (5.39 to 71.28)          |                   |      |
| <b>Age</b>                              |                             |                         |                          |                                 | 0.73              | 73   |
| <70 years                               | 60/174 (34)                 | 63/152 (41)             | 0.78 (0.55 to 1.12)      | -6.96% (-17.5 to 3.58)          |                   |      |
| ≥70 years                               | 10/31 (32)                  | 16/43 (37)              | 0.90 (0.41 to 1.99)      | -4.95% (-26.8 to 16.9)          |                   |      |
| <b>Sex</b>                              |                             |                         |                          |                                 | 0.64              | 73   |
| Male                                    | 51/149 (34)                 | 56/134 (42)             | 0.77 (0.53 to 1.12)      | -7.56% (-18.87 to 3.74)         |                   |      |
| Female                                  | 19/56 (34)                  | 23/61 (38)              | 0.92 (0.50 to 1.68)      | -3.78% (-21.15 to 13.59)        |                   |      |

**Abbreviations:** CI: Confidence interval; FDR: false discovery rate; HFO: High flow oxygen; HR: Hazard ratio; LFO: Low flow oxygen; NIPPV: Non-invasive positive pressure ventilation; SpO<sub>2</sub>:FiO<sub>2</sub>: pulse oximetric saturation to fraction of inspired oxygen.

Two-sided P values for interaction are reported. The false discovery rate accounts for multiplicity by calculating the expected proportion of tests with false positives at a specified rank of a set of tests.

**eTable 10.** Reasons for proning interruption (less than 8 hours) in the proning group

| <b>Reason</b>                       | <b>Number of patients (n=205)<sup>b</sup></b> |
|-------------------------------------|-----------------------------------------------|
| Patient Preference                  | 140 (68)                                      |
| Late Randomization                  | 33 (16)                                       |
| Not Documented                      | 18 (9)                                        |
| Desaturation                        | 8 (4)                                         |
| Oxygenation Mode <sup>a</sup>       | 5 (2)                                         |
| Lack of care team support           | 5 (2)                                         |
| Agitation                           | 4 (2)                                         |
| Patient transferred within hospital | 4 (2)                                         |
| Procedure                           | 1 (0.5)                                       |
| Discharged from Hospital            | 1 (0.5)                                       |
| Delirium                            | 1 (0.5)                                       |

<sup>a</sup> Oxygenation mode was deemed as a barrier to prone positioning that day.

<sup>b</sup> Each patient may have more than 1 reason for the incomplete proning. The second column indicate the number of patients with a specific reason at least once.

**eFigure 1.** Monthly and cumulative enrollment

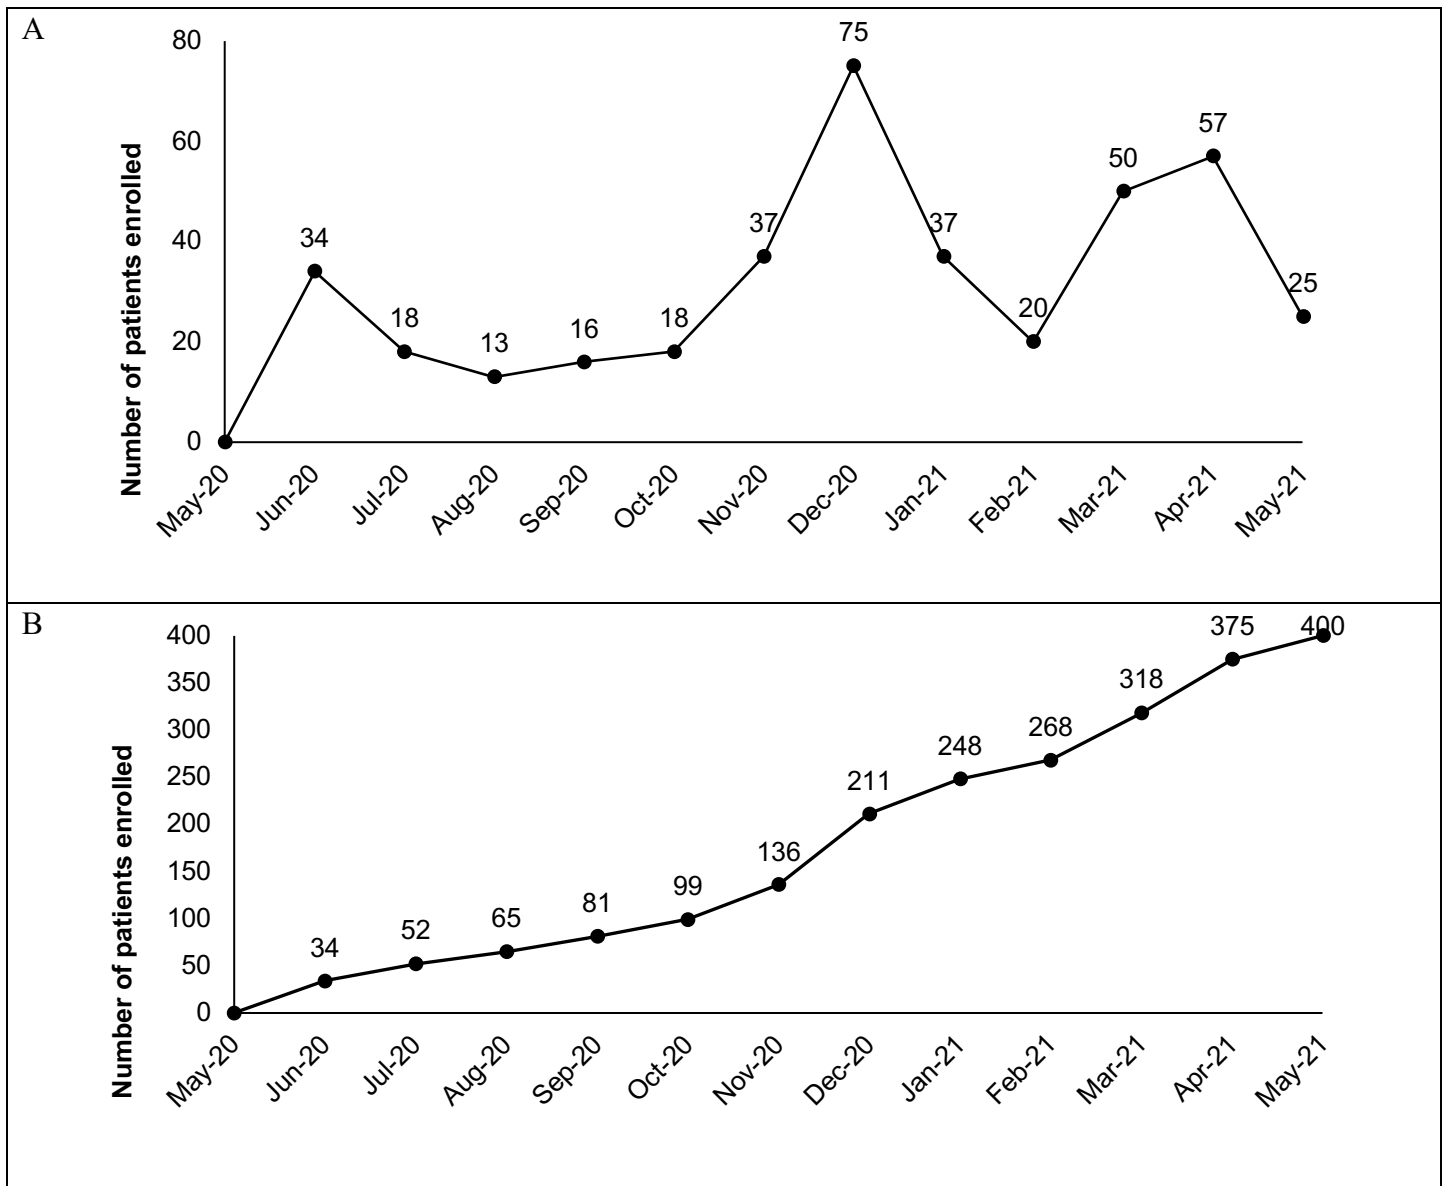

Panel A: Monthly enrollment. Panel B: Cumulative enrollment.



**eFigure 2.** Duration of proning over time

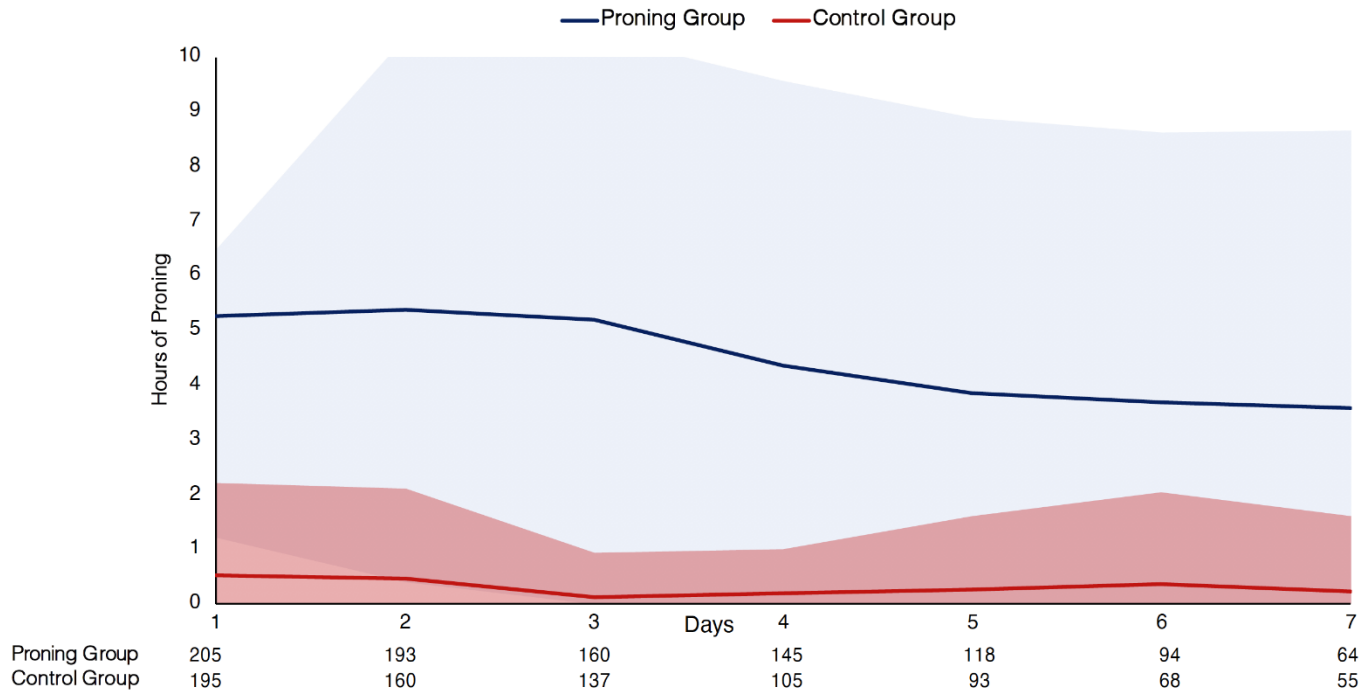

The means and standard deviations are displayed for the daily proning hours in the proning group (blue line) and in the control group (red line) over the first 7 days after randomization.

**eFigure 3.** Duration of proning in the per protocol population on days 1-4

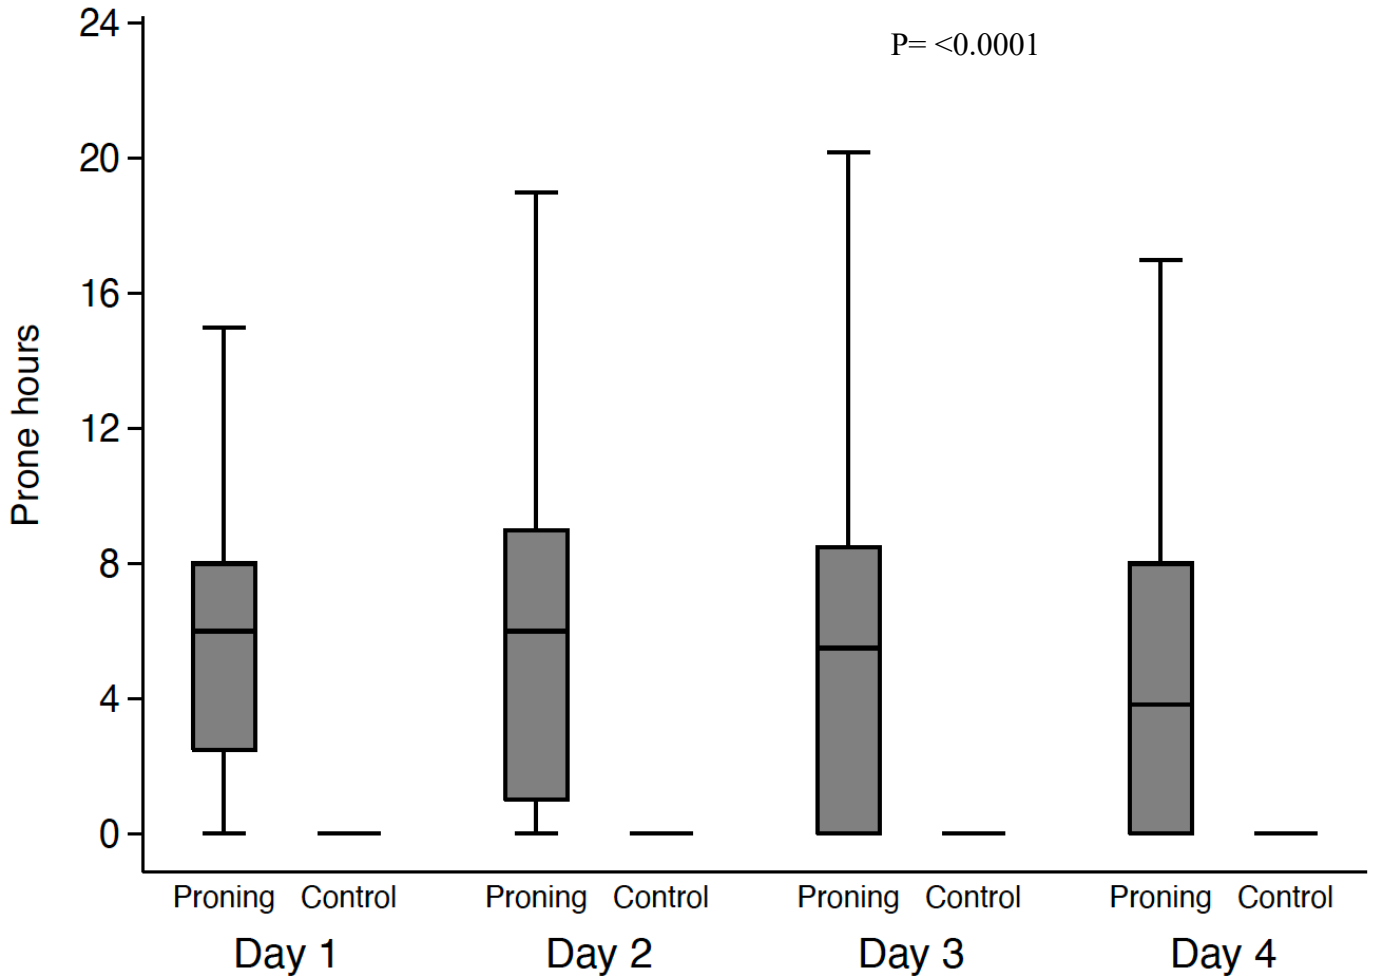

Excluding patients who did not prone in the intervention arm [n=21], and patients who did any proning in the control arm [n= 38]. Box plots are displayed with medians and quartiles 1 and 3. The error bars refer to 1.5x interquartile range. The P-value for the difference between the two groups over time is reported using a mixed linear model.

**eFigure 4.** Adherence to any prone positioning in the prone positioning group and control group

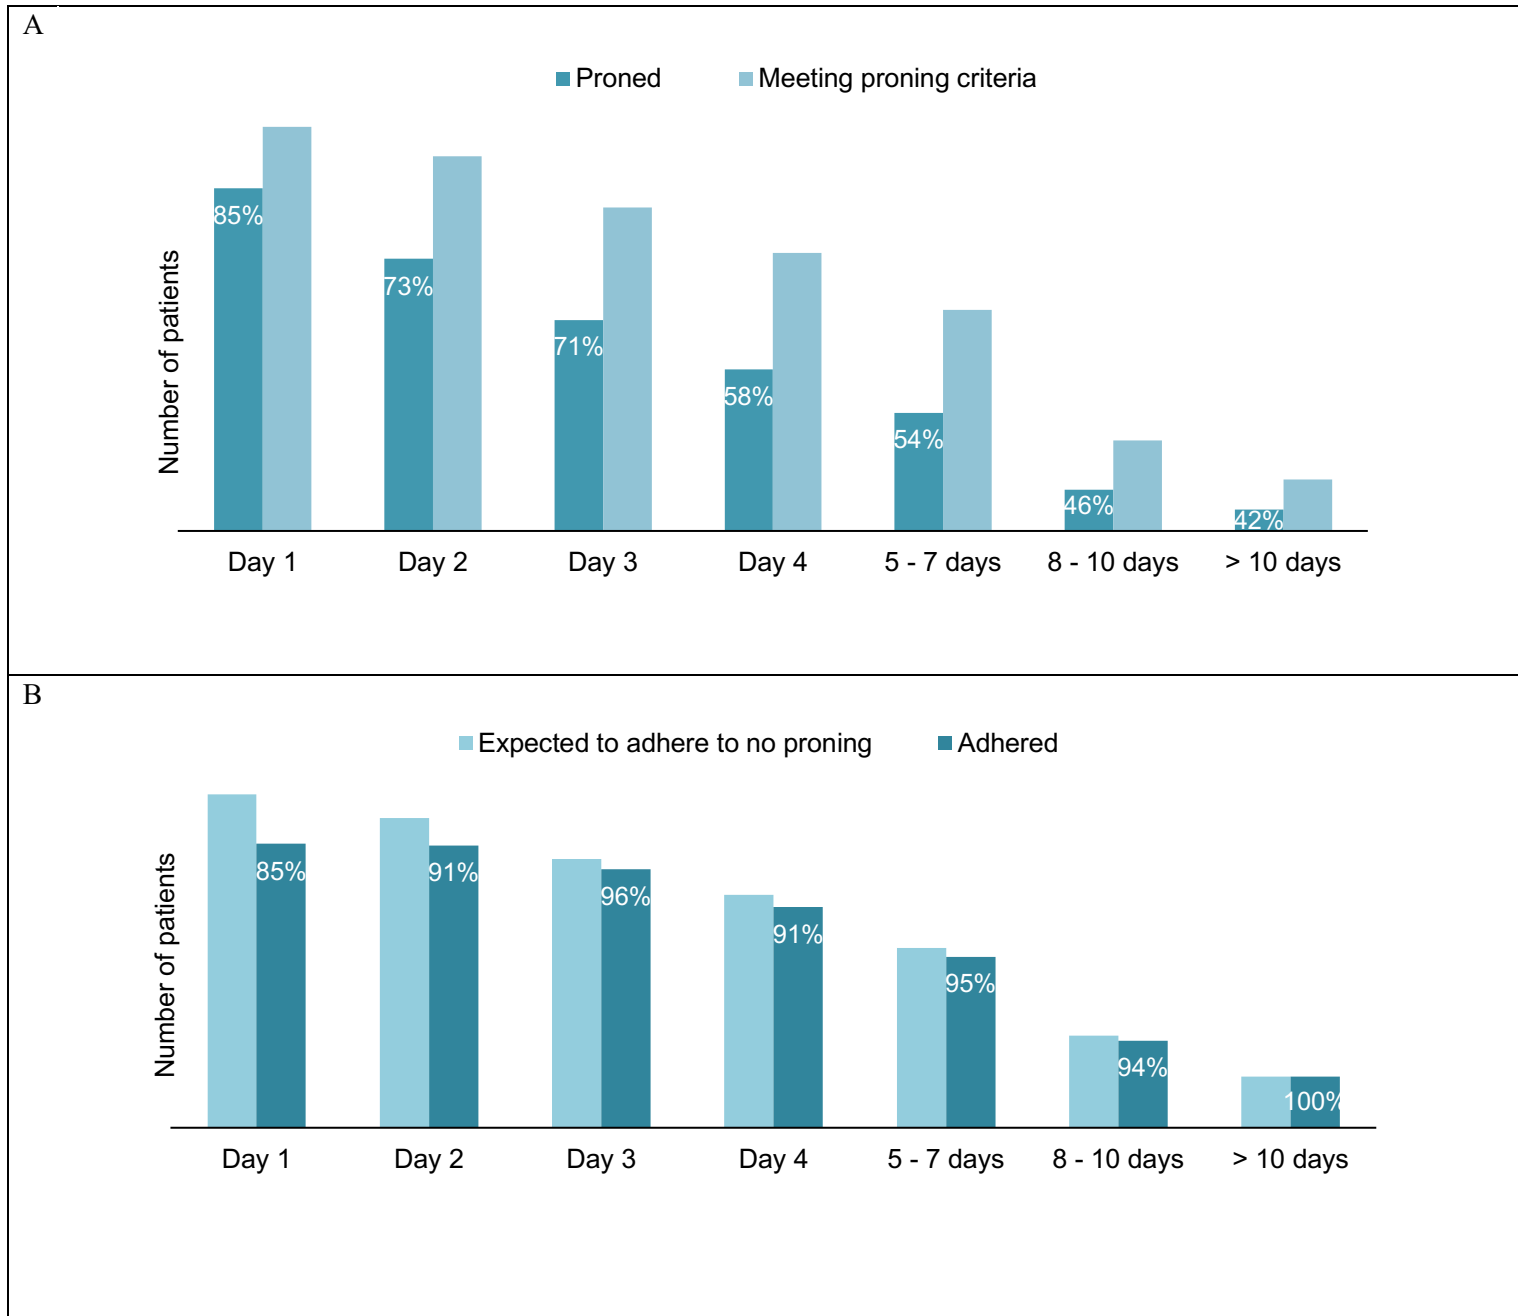

**Panel A:** Adherence to any prone positioning in the prone positioning group: Proportion of patients in the prone positioning group who performed proning (dark blue labeled: Proned) daily in relation to the total number of patients who did not meet stopping criteria (light blue labeled: Meeting proning criteria) that day. **Panel B:** Adherence to no prone positioning in the control group: Proportion of patients in the control group who did not perform any prone positioning dark blue (labeled: Adhered to no proning) in relation to the total number of patients who did not meet study stopping criteria (light blue labeled: Expected to adhere to proning).

**eFigure 5.** Mean SpO<sub>2</sub>:FiO<sub>2</sub> and standard deviations (error bars) pre and post proning (on day 1)

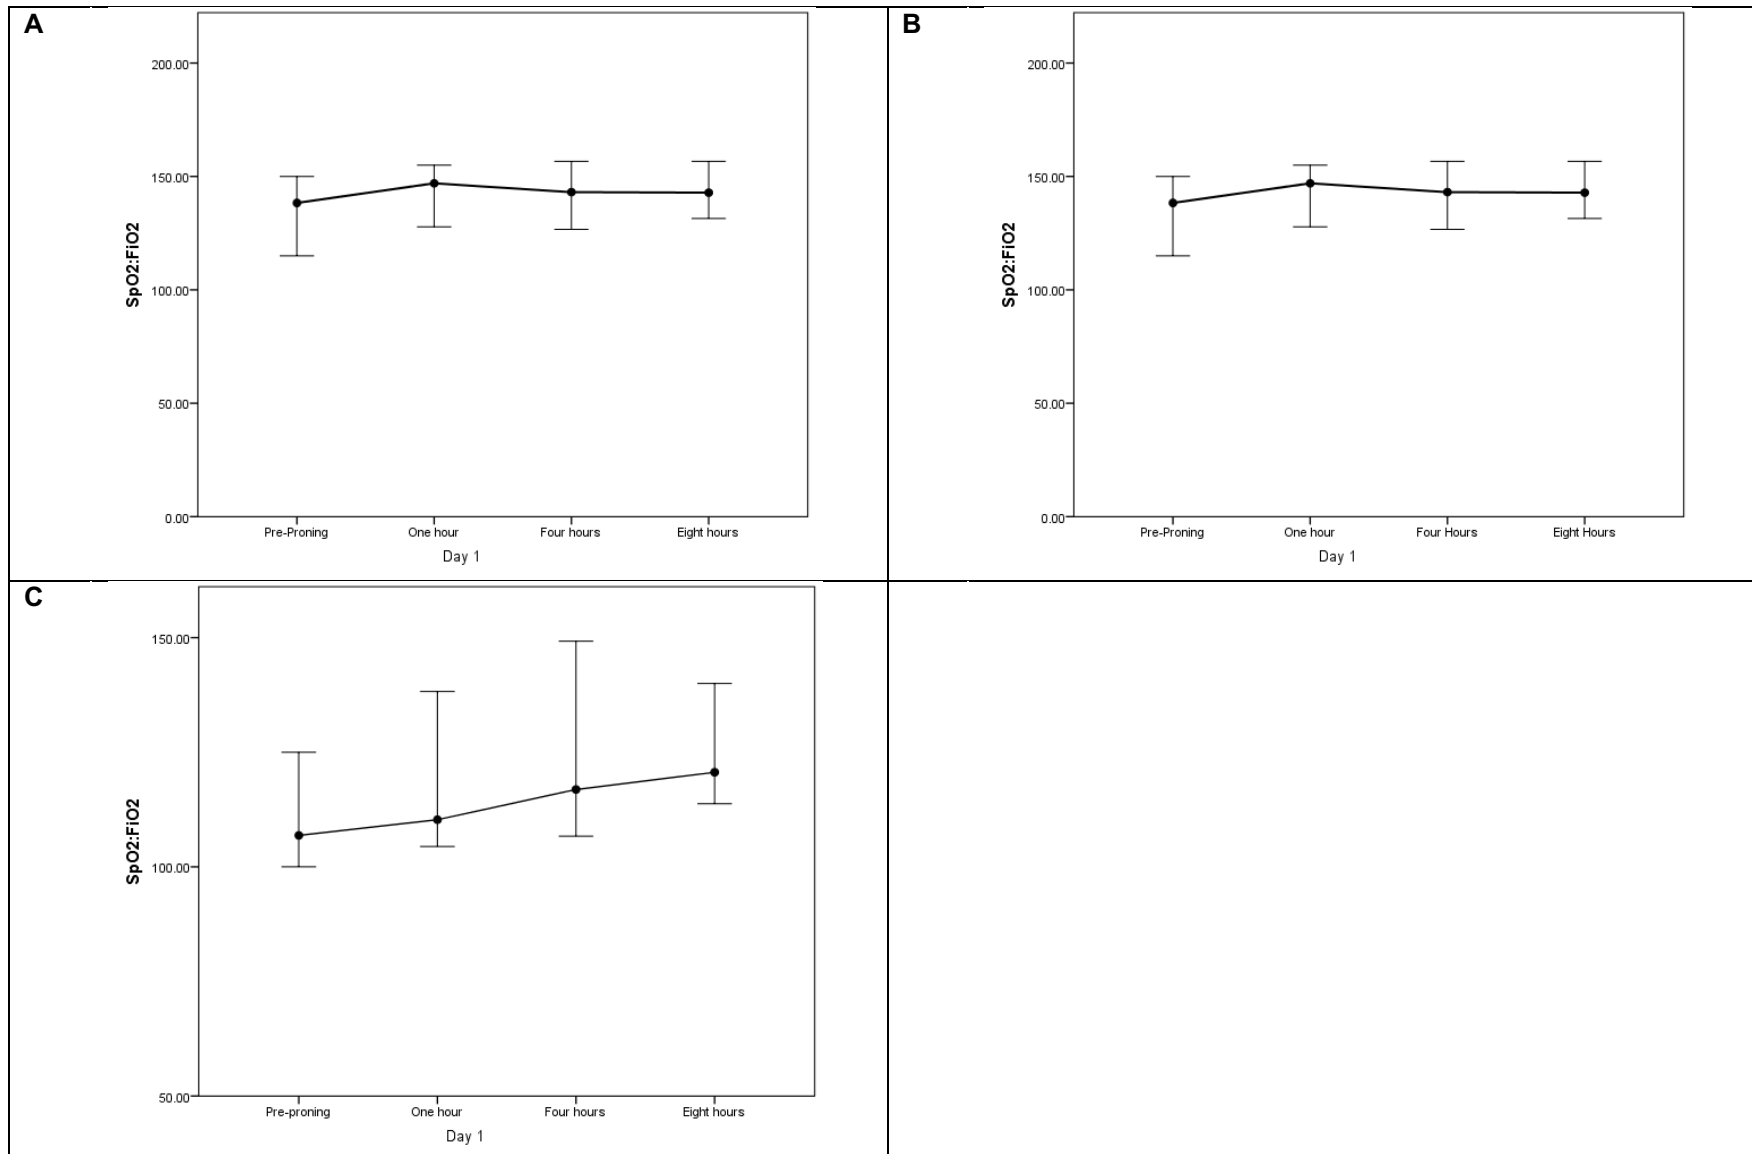

**Abbreviations:** SpO<sub>2</sub>:FiO<sub>2</sub> – peripheral oxygen saturation to fraction of inspired oxygen ratio.

**Panel A:** SpO<sub>2</sub>:FiO<sub>2</sub> values pre-proning, 1 hour after proning, 4 hours after proning, and 8 hours after proning in the intention-to-treat cohort. **Panel B:** SpO<sub>2</sub>:FiO<sub>2</sub> values pre-proning, 1 hour after proning, 4 hours after proning, and 8 hours after proning in the per protocol cohort. **Panel C:** SpO<sub>2</sub>:FiO<sub>2</sub> pre-proning, 1 hour after proning, 4 hours after proning, and 8 hours after proning while proning.

**eFigure 6.** SpO<sub>2</sub>:FiO<sub>2</sub> over time

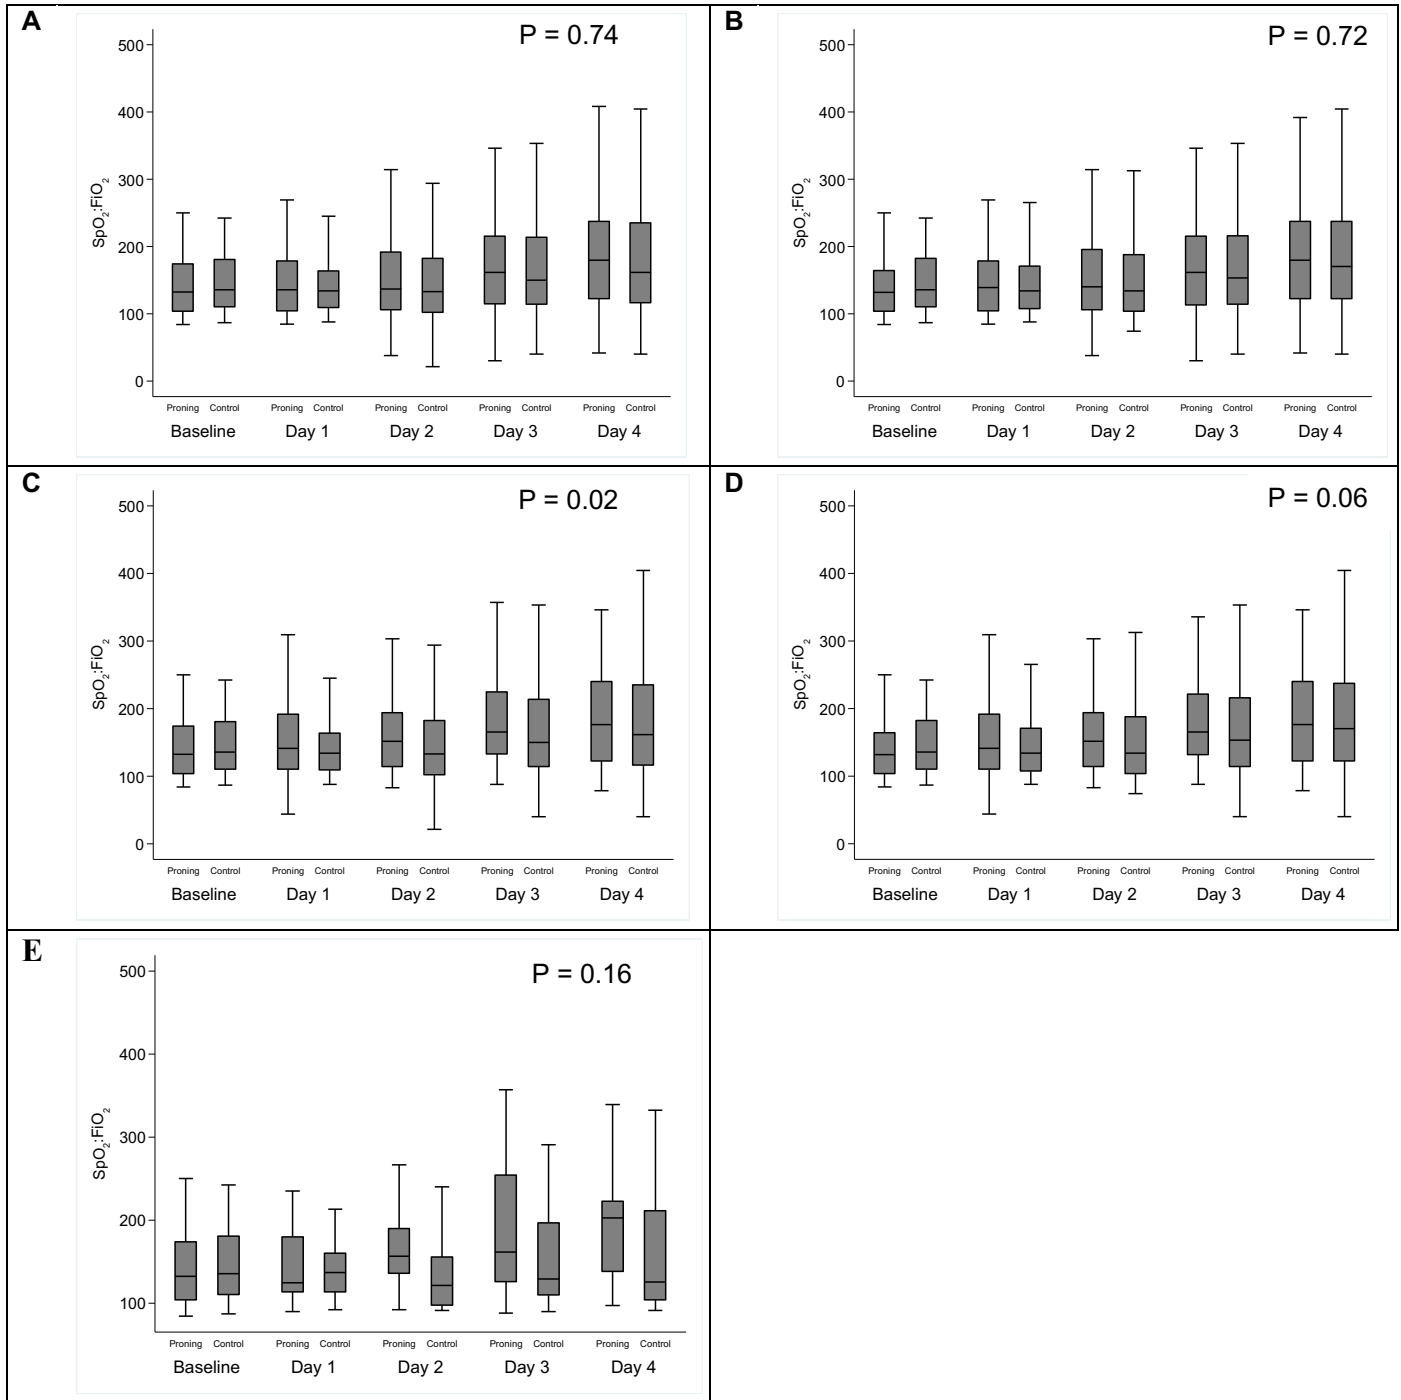

**Abbreviations:** SpO<sub>2</sub>:FiO<sub>2</sub> – peripheral oxygen saturation to fraction of inspired oxygen ratio.

The box plots are displayed with medians and quartiles 1 and 3. The error bars refer to 1.5x interquartile range. The P-value for the difference between the two groups over time is reported using a mixed linear model. **Panel A:** SpO<sub>2</sub>:FiO<sub>2</sub> over time in the intention-to-treat cohort in the prone positioning (pre-proning values) and control groups. **Panel B:** SpO<sub>2</sub>:FiO<sub>2</sub> over time in the per protocol cohort in the prone positioning (pre-proning values) and control groups. **Panel C:** SpO<sub>2</sub>:FiO<sub>2</sub> over time in the intention-to-treat cohort in the prone positioning (8 hours post proning values) and control groups. **Panel D:** SpO<sub>2</sub>:FiO<sub>2</sub> over time in the Per protocol cohort in the prone positioning (8 hours post proning values) and control groups. **Panel E:** SpO<sub>2</sub>:FiO<sub>2</sub> over time while in prone positioning the prone positioning (8 hours post proning values) group versus control group.

**eFigure 7.** Fraction of inspired oxygen in study groups over time

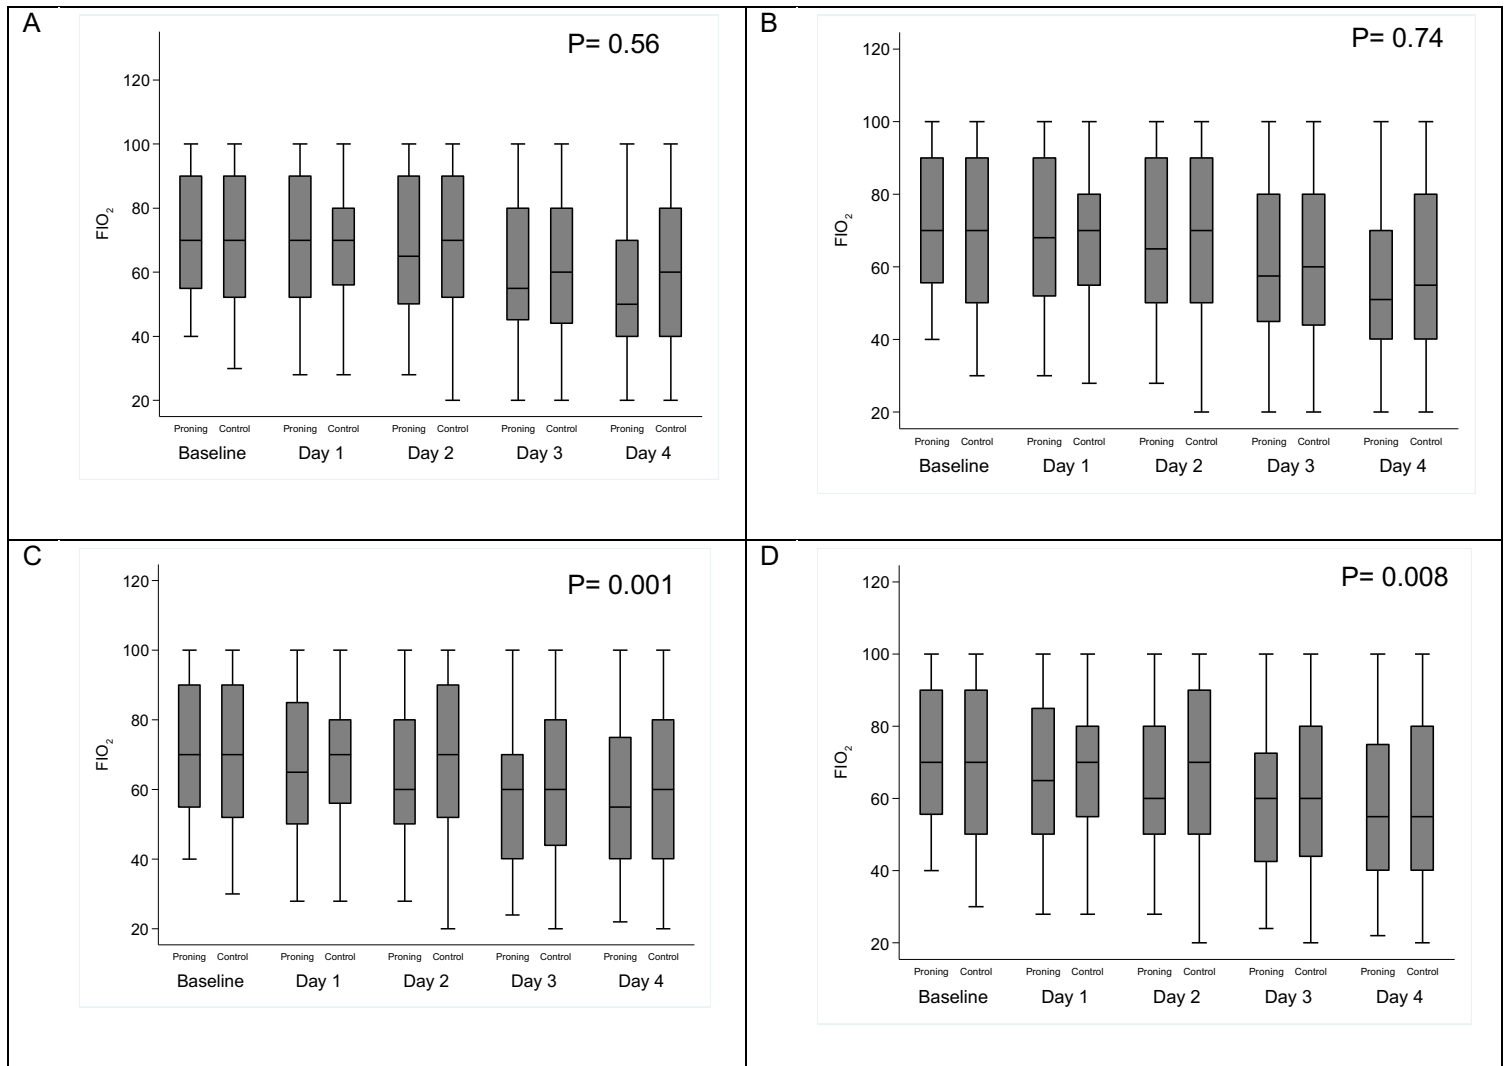

**Abbreviations:** FiO<sub>2</sub> – Fraction of inspired oxygen.

Box plots are displayed with medians and quartiles 1 and 3. The error bars refer to 1.5x interquartile range. The P-value for the difference between the two groups over time is reported using a mixed linear model. **Panel A:** Fraction of inspired oxygen in the proning (pre-proning values) and control groups on days 1 to 4 by in the intention-to-treat cohort. **Panel B:** Fraction of inspired oxygen in the proning (pre-proning values) and control groups on days 1 to 4 by in the per protocol cohort. **Panel C:** Fraction of inspired oxygen in the proning (8 hours after proning) and control groups on days 1 to 4 by in the intention-to-treat cohort. **Panel D:** Fraction of inspired oxygen in the proning (8 hours after proning) and control groups on days 1 to 4 by in the per protocol cohort.
