# Supplementary material
Source: PubMed Central journal article supplement (PMC9108999)
Supplement: jama-e227993-s004.pdf [file jama-e227993-s004.pdf]

\*First name, last name, and suffix (if applicable) are required and will appear in PubMed.

| <b>*Group Name(s): COVI-PRONE Trial Investigators and the Saudi Critical Care Trials Group</b> |                    |                              |                  |             |                                          |                                                         |                                                                                            |
|------------------------------------------------------------------------------------------------|--------------------|------------------------------|------------------|-------------|------------------------------------------|---------------------------------------------------------|--------------------------------------------------------------------------------------------|
| <b>*First Name and Middle Initial(s)</b>                                                       | <b>*Last Name</b>  | <b>*Suffix (eg, Jr, III)</b> | Academic Degrees | Institution | Location (city, state/province, country) | Role or Contribution, eg, chair, principal investigator | Group (if more than 1 Group listed in the byline) and/or Subgroup (eg, Steering Committee) |
| Kara                                                                                           | Nerenberg          |                              |                  |             |                                          |                                                         | COVI-PRONE Investigators                                                                   |
| Alexis                                                                                         | Turgeon            |                              |                  |             |                                          |                                                         | COVI-PRONE Investigators                                                                   |
| Charles                                                                                        | Francoeur          |                              |                  |             |                                          |                                                         | COVI-PRONE Investigators                                                                   |
| Guillaume                                                                                      | Leblanc            |                              |                  |             |                                          |                                                         | COVI-PRONE Investigators                                                                   |
| Maude                                                                                          | St-Onge            |                              |                  |             |                                          |                                                         | COVI-PRONE Investigators                                                                   |
| Lorenzo                                                                                        | Del Sorbo          |                              |                  |             |                                          |                                                         | COVI-PRONE Investigators                                                                   |
| Rosa                                                                                           | M Estrada-Y-Martin |                              |                  |             |                                          |                                                         | COVI-PRONE Investigators                                                                   |
| Hala                                                                                           | Hamada             |                              |                  |             |                                          |                                                         | COVI-PRONE Investigators                                                                   |
| Abdulaziz                                                                                      | Al-Mutawa          |                              |                  |             |                                          |                                                         | COVI-PRONE Investigators                                                                   |
| Ardeshir                                                                                       | Algooneh           |                              |                  |             |                                          |                                                         | COVI-PRONE Investigators                                                                   |
| Farhan                                                                                         | Alenezi            |                              |                  |             |                                          |                                                         | COVI-PRONE Investigators                                                                   |
| Eman                                                                                           | Al Qasim           |                              |                  |             |                                          |                                                         | COVI-PRONE Investigators, Saudi Critical Care Trials Group                                 |
| Hussain                                                                                        | Al Haji            |                              |                  |             |                                          |                                                         | COVI-PRONE Investigators, Saudi Critical Care Trials Group                                 |

## Supplemental Online Content: Nonauthor Collaborators

\*First name, last name, and suffix (if applicable) are required and will appear in PubMed.

| *First Name and Middle Initial(s) | *Last Name | *Suffix (eg, Jr, III) | Academic Degrees | Institution | Location (city, state/province, country) | Role or Contribution, eg, chair, principal investigator | Group (if more than 1 Group listed in the byline) and/or Subgroup (eg, Steering Committee) |
|-----------------------------------|------------|-----------------------|------------------|-------------|------------------------------------------|---------------------------------------------------------|--------------------------------------------------------------------------------------------|
| Mohammad                          | Al Mutairi |                       |                  |             |                                          |                                                         | COVI-PRONE Investigators, Saudi Critical Care Trials Group                                 |
| Omar                              | Zumai      |                       |                  |             |                                          |                                                         | COVI-PRONE Investigators, Saudi Critical Care Trials Group                                 |
| Amal                              | Matroud    |                       |                  |             |                                          |                                                         | COVI-PRONE Investigators, Saudi Critical Care Trials Group                                 |
| Musharaf                          | Sadat      |                       |                  |             |                                          |                                                         | COVI-PRONE Investigators, Saudi Critical Care Trials Group                                 |
| Felwa                             | Bin Humaid |                       |                  |             |                                          |                                                         | COVI-PRONE Investigators, Saudi Critical Care Trials Group                                 |
| Wedyan                            | Al Wehaibi |                       |                  |             |                                          |                                                         | COVI-PRONE Investigators, Saudi Critical Care Trials Group                                 |
| Faisal                            | Al-Basseet |                       |                  |             |                                          |                                                         | COVI-PRONE Investigators, Saudi Critical Care Trials Group                                 |
| Mohammed                          | Alobaidi   |                       |                  |             |                                          |                                                         | COVI-PRONE Investigators, Saudi Critical Care Trials Group                                 |

## Supplemental Online Content: Nonauthor Collaborators

\*First name, last name, and suffix (if applicable) are required and will appear in PubMed.

| *First Name and Middle Initial(s) | *Last Name    | *Suffix (eg, Jr, III) | Academic Degrees | Institution | Location (city, state/province, country) | Role or Contribution, eg, chair, principal investigator | Group (if more than 1 Group listed in the byline) and/or Subgroup (eg, Steering Committee) |
|-----------------------------------|---------------|-----------------------|------------------|-------------|------------------------------------------|---------------------------------------------------------|--------------------------------------------------------------------------------------------|
| Muhammed                          | Alshahrani    |                       |                  |             |                                          |                                                         | COVI-PRONE Investigators, Saudi Critical Care Trials Group                                 |
| Yousef                            | Almubarak     |                       |                  |             |                                          |                                                         | COVI-PRONE Investigators, Saudi Critical Care Trials Group                                 |
| Laila                             | Perlas Asonto |                       |                  |             |                                          |                                                         | COVI-PRONE Investigators, Saudi Critical Care Trials Group                                 |
| Charlene                          | Mapusao       |                       |                  |             |                                          |                                                         | COVI-PRONE Investigators, Saudi Critical Care Trials Group                                 |
| Katherine                         | Cruz          |                       |                  |             |                                          |                                                         | COVI-PRONE Investigators, Saudi Critical Care Trials Group                                 |
| Arivu                             | Muthu         |                       |                  |             |                                          |                                                         | COVI-PRONE Investigators, Saudi Critical Care Trials Group                                 |
| Shaya                             | Y AlQahtani   |                       |                  |             |                                          |                                                         | COVI-PRONE Investigators, Saudi Critical Care Trials Group                                 |
| Mae                               | Ann Santillan |                       |                  |             |                                          |                                                         | COVI-PRONE Investigators, Saudi Critical Care Trials Group                                 |

Supplemental Online Content: Nonauthor Collaborators

\*First name, last name, and suffix (if applicable) are required and will appear in PubMed.

| *First Name and Middle Initial(s) | *Last Name  | *Suffix (eg, Jr, III) | Academic Degrees | Institution | Location (city, state/province, country) | Role or Contribution, eg, chair, principal investigator | Group (if more than 1 Group listed in the byline) and/or Subgroup (eg, Steering Committee) |
|-----------------------------------|-------------|-----------------------|------------------|-------------|------------------------------------------|---------------------------------------------------------|--------------------------------------------------------------------------------------------|
| Amera                             | Rahmatullah |                       |                  |             |                                          |                                                         | COVI-PRONE Investigators, Saudi Critical Care Trials Group                                 |
| Shatha                            | Baraja'a    |                       |                  |             |                                          |                                                         | COVI-PRONE Investigators, Saudi Critical Care Trials Group                                 |
| Haya                              | Al Othaimen |                       |                  |             |                                          |                                                         | COVI-PRONE Investigators, Saudi Critical Care Trials Group                                 |
| Fahad                             | Al-Hameed   |                       |                  |             |                                          |                                                         | COVI-PRONE Investigators, Saudi Critical Care Trials Group                                 |
| Gulam                             | Rasool      |                       |                  |             |                                          |                                                         | COVI-PRONE Investigators, Saudi Critical Care Trials Group                                 |
| Ohoud                             | Alorabi     |                       |                  |             |                                          |                                                         | COVI-PRONE Investigators, Saudi Critical Care Trials Group                                 |
| Gauhar                            | Khan        |                       |                  |             |                                          |                                                         | COVI-PRONE Investigators, Saudi Critical Care Trials Group                                 |
| Jamal                             | Chalabi     |                       |                  |             |                                          |                                                         | COVI-PRONE Investigators, Saudi Critical Care Trials Group                                 |

## Supplemental Online Content: Nonauthor Collaborators

\*First name, last name, and suffix (if applicable) are required and will appear in PubMed.

| *First Name and Middle Initial(s) | *Last Name | *Suffix (eg, Jr, III) | Academic Degrees | Institution | Location (city, state/province, country) | Role or Contribution, eg, chair, principal investigator | Group (if more than 1 Group listed in the byline) and/or Subgroup (eg, Steering Committee) |
|-----------------------------------|------------|-----------------------|------------------|-------------|------------------------------------------|---------------------------------------------------------|--------------------------------------------------------------------------------------------|
| Zuheb                             | Nagoor     |                       |                  |             |                                          |                                                         | COVI-PRONE Investigators, Saudi Critical Care Trials Group                                 |
| Ammar                             | Alkroud    |                       |                  |             |                                          |                                                         | COVI-PRONE Investigators, Saudi Critical Care Trials Group                                 |
| Arwa                              | Alhussaini |                       |                  |             |                                          |                                                         | COVI-PRONE Investigators, Saudi Critical Care Trials Group                                 |
| Ahmad                             | Qureshi    |                       |                  |             |                                          |                                                         | COVI-PRONE Investigators, Saudi Critical Care Trials Group                                 |
| Ahmad                             | Quadri     |                       |                  |             |                                          |                                                         | COVI-PRONE Investigators, Saudi Critical Care Trials Group                                 |
| Babar                             | Javed      |                       |                  |             |                                          |                                                         | COVI-PRONE Investigators, Saudi Critical Care Trials Group                                 |
| Khalid                            | Idrees     |                       |                  |             |                                          |                                                         | COVI-PRONE Investigators, Saudi Critical Care Trials Group                                 |
