# Supplementary material
Source: PubMed Central journal article supplement (PMC9108999)
Supplement: jama-e227993-s005.pdf [file jama-e227993-s005.pdf]

## Data Sharing Statement

Alhazzani. Effect of Awake Prone Positioning on Endotracheal Intubation in Patients With COVID-19 and Acute Respiratory Failure. *JAMA*. Published May 15, 2022.  
doi:10.1001/jama.2022.7993

### Data

**Data available:** Yes

**Data types:** Deidentified participant data, Data dictionary

**How to access data:** [waleed.al-hazzani@medportal.ca](mailto:waleed.al-hazzani@medportal.ca)

**When available:** With publication

### Supporting Documents

**Document types:** Statistical/analytic code, Informed consent form

**How to access documents:** [waleed.al-hazzani@medportal.ca](mailto:waleed.al-hazzani@medportal.ca)

**When available:** With publication

### Additional Information

**Who can access the data:** Researchers whose proposed use of the data has been approved

**Types of analyses:** Individual patient data meta-analysis

**Mechanisms of data availability:** With a signed data access agreement, with Investigators support
